# Supplementary material
Source: PubMed Central journal article supplement (PMC1266120)

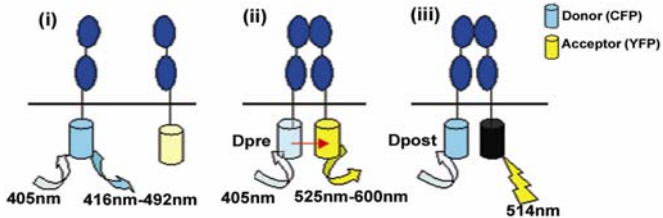

Supplement: pnas_0507257102_1.pdf [file pnas_0507257102_1.pdf]

## B7-2

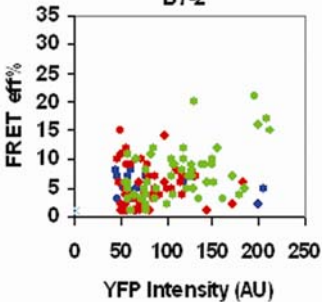

Supplement: pnas_0507257102_2.pdf [file pnas_0507257102_2.pdf]

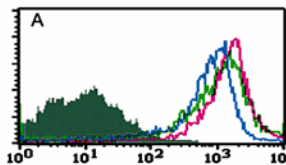

B7-1

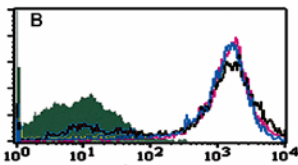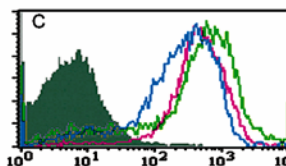

CTLA-4-Ig-Cy5

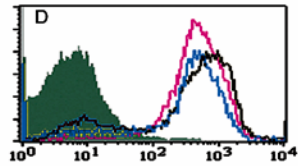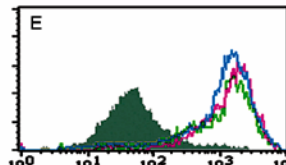

CD28-Ig-Cy5

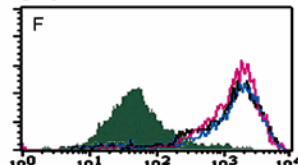

Supplement: pnas_0507257102_3.pdf [file pnas_0507257102_3.pdf]
